# Supplementary material for: Chlorine-36∕beryllium-10 burial dating of alluvial fan sediments associated with the Mission Creek strand of the San Andreas Fault system, California, USA
Source: Copernicus journal article supplement (doi:10.5194/gchron-1-1-2019), 2019-07-18
Supplement: Supplementary file 1 [file SF1_201504_Be10_datareduction.xlsx]

## Sheet: BE 14-12-30 19h32 Blisniuk_SCEC
	Standard used for normalization:			07KNSTD3110
	10/9 ratio for standard =		2.85e-12
	Carrier background for stds=
	Boron correction factor =		(1.7±0.5)x10^-4
									10Be/9Be RATIO		10Be/9Be RATIO		10Be/9Be RATIO
									( CORRECTED FOR BORON)		(SAMPLE BKGD)		(CORR. FOR BKGDS)
	DATE	SAMPLE NAME	CAMS #	runs	r_to_rstd	interror	exterror	Truefrac	BE_ratio1	ratio_err1	bkgd_ratio	bkgd_error	RATIO	ERROR
STANDARD	2014-12-30	KNSTD 3110	BE37889	11	0.992198	0.0051474	0.0066353	0.999785	2.82776e-12	1.89106e-14			2.82776e-12	1.89106e-14	0.992198	0.00668748	07KNSTD3110		-1.16664
STANDARD	2014-12-30	KNSTD 3110	BE37888	12	1.0126	0.0049143	0.0078679	0.999783	2.88592e-12	2.24235e-14			2.88592e-12	2.24235e-14	1.0126	0.00776998	07KNSTD3110		1.62188
STANDARD	2014-12-30	KNSTD 3110	BE38288	13	0.997159	0.0045697	0.0036113	0.999793	2.8419e-12	1.30236e-14			2.8419e-12	1.30236e-14	0.997159	0.00458272	07KNSTD3110		-0.619916
STANDARD	2014-12-30	KNSTD 3110	BE38289	11	0.994904	0.0046469	0.0078512	0.999806	2.83548e-12	2.23759e-14			2.83548e-12	2.23759e-14	0.994904	0.00789141	07KNSTD3110		-0.645752
STANDARD	2014-12-30	KNSTD 3110	BE38290	9	0.992053	0.0051402	0.0059263	0.999807	2.82735e-12	1.689e-14			2.82735e-12	1.689e-14	0.992053	0.00597377	07KNSTD3110		-1.33033
STANDARD	2014-12-30	KNSTD 3110	BE38291	8	1.00334	0.0056423	0.0076865	0.999811	2.85953e-12	2.19065e-14			2.85953e-12	2.19065e-14	1.00334	0.00766088	07KNSTD3110		0.436503
STANDARD	2014-12-30	KNSTD 549	BE37840	8	0.191144	0.0022027	0.0026153	0.999562	5.4476e-13	7.45361e-15			5.4476e-13	7.45361e-15	1.01824	0.0136824	07KNSTD3110		1.33326
STANDARD	2014-12-30	KNSTD 549	BE37542	5	0.180578	0.0025977	0.0024894	0.999444	5.14646e-13	7.40345e-15			5.14646e-13	7.40345e-15	0.961955	0.0143855	07KNSTD3110		-2.64468
STANDARD	2014-12-30	KNSTD 1032	BE38267	6	0.356852	0.0029144	0.0034365	0.999698	1.01703e-12	9.79402e-15			1.01703e-12	9.79402e-15	1.04633	0.00963003	07KNSTD3110		4.81063
STANDARD	2014-12-30	KNSTD 1032	BE38268	5	0.370233	0.0032212	0.0032431	0.999747	1.05516e-12	9.24284e-15			1.05516e-12	9.24284e-15	1.08556	0.00875962	07KNSTD3110		9.76748
STANDARD	2014-12-30	KNSTD 9422	BE38309	8	2.95661	0.0124195	0.0426588	0.999821	8.42633e-12	1.21578e-13			8.42633e-12	1.21578e-13	0.984385	0.0144283	07KNSTD3110		-1.08227
STANDARD	2014-12-30	KNSTD 9422	BE38306	4	2.999	0.0178719	0.0349832	0.999814	8.54715e-12	9.97021e-14			8.54715e-12	9.97021e-14	0.998498	0.011665	07KNSTD3110		-0.128719
Blisniuk/Oskin	2014-12-30	LC-1	BE38166	4	0.0067229	0.0003721	0.0006467	0.884528	1.91603e-14	1.8431e-15	3.82156e-15	4.1553e-16	1.53387e-14	1.88936e-15		0.123176	07KNSTD3110
Blisniuk/Oskin	2014-12-30	BB-MC	BE38167	2	0.0012487	0.0001413	0.0001234	0.770267	3.5588e-15	4.02705e-16			3.5588e-15	4.02705e-16		0.113158	07KNSTD3110
Blisniuk/Oskin	2014-12-30	MC-P6-1	BE38168	4	0.0078413	0.0003557	0.0002237	0.926817	2.23477e-14	1.01375e-15	3.29631e-15	3.5625e-16	1.90514e-14	1.07452e-15		0.0564011	07KNSTD3110
Blisniuk/Oskin	2014-12-30	MC-P6-2	BE38169	3	0.0107307	0.0007656	0.0003944	0.962307	3.05825e-14	2.18196e-15	3.29631e-15	3.5625e-16	2.72862e-14	2.21085e-15		0.0810246	07KNSTD3110
Blisniuk/Oskin	2014-12-30	MC-P7-1	BE38170	3	0.0092883	0.0006633	0.0006425	0.888171	2.64717e-14	1.8904e-15	3.29631e-15	3.5625e-16	2.31753e-14	1.92368e-15		0.0830055	07KNSTD3110
Blisniuk/Oskin	2014-12-30	MC-P7-2	BE38171	3	0.0105764	0.000836	0.0007366	0.867039	3.01427e-14	2.3826e-15	3.29631e-15	3.5625e-16	2.68464e-14	2.40909e-15		0.0897358	07KNSTD3110
Blisniuk/Oskin	2014-12-30	MC-P7B-1	BE38172	3	0.167676	0.0031828	0.0043915	0.991484	4.77877e-13	1.25158e-14	3.29631e-15	3.5625e-16	4.7458e-13	1.25208e-14		0.026383	07KNSTD3110
Blisniuk/Oskin	2014-12-30	MC-P8-1	BE38173	3	0.0086372	0.0007076	0.0005585	0.871312	2.4616e-14	2.01666e-15	3.29631e-15	3.5625e-16	2.13197e-14	2.04788e-15		0.0960559	07KNSTD3110
Blisniuk/Oskin	2014-12-30	MCP-11	BE38174	3	0.008778	0.0004478	0.0005018	0.956505	2.50173e-14	1.43013e-15	3.29631e-15	3.5625e-16	2.1721e-14	1.47383e-15		0.067853	07KNSTD3110
Blisniuk/Oskin	2014-12-30	MCP-11a	BE38175	1									low current no data				07KNSTD3110
Blisniuk/Oskin	2014-12-30	MCP-11b	BE38176	3	0.0115357	0.0007257	0.0002311	0.872312	3.28767e-14	2.06825e-15	3.29631e-15	3.5625e-16	2.95804e-14	2.0987e-15		0.070949	07KNSTD3110
		Sample	ID	Current (microA)
		BB-MC	BE38167	23.9	22.9
		LC-1	BE38166	7.4	8.1	7.7	7.3
		MC-P6-1	BE38168	10.1	9.4	9.5	8.9
		MC-P6-2	BE38169	5	3.4	2.2
		MC-P7-1	BE38170	4.9	4	3.7
		MC-P7-2	BE38171	4.6	3.4	1.3
		MC-P7B-1	BE38172	4.1	3.5	3.6
		MC-P8-1	BE38173	3.6	3.3	3.4
		MCE-2	BE38158	12.2	5.8	6.9
		MCE-3	BE38159	14	11.8	13.2	10.3
		MCE-4	BE38160	4.2	4.4	4	3.8
		MCE-5	BE38161	15.2	16	14.3	10.8
		MCE-6	BE38162	11.1	8.8	8.4
		MCP-11	BE38174	12.7	9.5	4.1
		MCP-11a	BE38175	1.5
		MCP-11b	BE38176	4.7	4.8	4.8
		PT-15	BE38178	11.5	13.1	13.4
		PT-16	BE38179	12.8	9.1	7.8
		PT-20	BE38182	17.9	18.5	18
		KNSTD 1032	BE38267	15.8	17.4	18	16.3	15.5	16.5
		KNSTD 1032	BE38268	15.7	17.3	16.7	18.5	17.7
		KNSTD 3110	BE37888	26.3	22.2	25.5	27.4	27.8	27.3	27.1	27.3	26.6	25.4	25.2	25.7
		KNSTD 3110	BE37889	25	24.5	22.1	25.9	26.2	26.3	27.8	27.5	26.1	25.3	25.5	27.2
		KNSTD 3110	BE38288	24	25	26.2	25.4	25.9	24.3	23.1	22.7	20.4	19.5	17	12.6	11.3
		KNSTD 3110	BE38289	21.7	24.8	25.8	23.2	23.7	23.3	22.5	21.3	19.1	19.5	19.3
		KNSTD 3110	BE38290	23	19.7	23.1	22.6	22.4	22.5	18.6	19.4	20.5
		KNSTD 3110	BE38291	24.1	18.9	21.4	22.9	23.6	19.7	20.6	21.3
		KNSTD 549	BE37542	25.9	27.8	28.2	26.5	26.9
		KNSTD 549	BE37840	22.2	21	17.8	25.2	25.4	24.5	22.7	17.2
		KNSTD 9422	BE38306	21.4	16.6	15.2	16
		KNSTD 9422	BE38309	22	25.5	28	27.5	29.6	25.9	21.5	22.9

## Sheet: Be10_datareduction
Be-10 data reduction for 36/10 burial dating, June 2015, chemistry done at Stanford
Questions on this spreadsheet: Greg Balco, balcs@bgc.org
1. Blanks.
		Rm	delRm	Mc (g)	N10b (atoms)	uncert
BB-MC	BE38167	3.559e-15	4.027e-16	0.000305852	72753.7	8232.06
2. Samples.
AMS data					Chem data from 'labdata' tab
						Sample		Carrier wt	Total atoms	Less blank	blank pct	N10	uncert			error terms
Sample	BE no.	Rm	delRm		Sample	wt (g)	Mc (mg)	Be Mc (g)	Be-10	(atoms)	total ats	(atoms/g)	(atoms/g)	pct err	pct ams err	dNdR	dNdN10b	dNdMc
LC-1	BE38166	1.91603e-14	1.8431e-15	LC-1	LC-1	41.7329	0.312186	0.000312186	399789	327036	18.198	7836.4	947.239	12.0877	9.61936	4.99978e+17	0.0239619	3.06859e+07
MC-P6-1	BE38168	2.23477e-14	1.01375e-15	MC-P6-1	MC-P6-1	41.6895	0.311559	0.000311559	465360	392606	15.6339	9417.39	554.842	5.89168	4.53624	4.99493e+17	0.0239869	3.5828e+07
MC-P6-2	BE38169	3.05825e-14	2.18196e-15	MC-P6-2	MC-P6-2	44.8896	0.300951	0.000300951	615156	542402	11.8269	12083	1004.16	8.31051	7.13467	4.48091e+17	0.0222769	4.55348e+07
MC-P7-1	BE38170	2.64717e-14	1.8904e-15	MC-P7-1	MC-P7-1	49.2385	0.312079	0.000312079	552155	479402	13.1763	9736.31	825.727	8.4809	7.14124	4.23619e+17	0.0203093	3.59329e+07
MC-P7-2	BE38171	3.01427e-14	2.3826e-15	MC-P7-2	MC-P7-2	40.1762	0.312126	0.000312126	628824	556071	11.5698	13840.8	1263.75	9.13062	7.90439	5.19251e+17	0.0248904	5.01453e+07
MC-P7B-1	BE38172	4.77877e-13	1.25158e-14	MC-P7B-1	MC-P7B-1	47.1277	0.31114	0.00031114	9.93775e+06	9.865e+06	0.732094	209325	5914.19	2.82536	2.61904	4.41262e+17	0.0212189	6.77728e+08
MC-P8-1	BE38173	2.4616e-14	2.01666e-15	MC-P8-1	MC-P8-1	40.1684	0.311893	0.000311893	513145	440391	14.178	10963.6	1074.08	9.79672	8.19247	5.18965e+17	0.0248952	4.0959e+07
MCP-11	BE38174	2.50173e-14	1.43013e-15	MCP-11	MCP-11	40.9221	0.312545	0.000312545	522599	449845	13.9215	10992.7	767.94	6.98589	5.71656	5.1047e+17	0.0244367	4.086e+07
MCP-11b	BE38176	3.28767e-14	2.06825e-15	MCP-11b	MCP-11B	40.988	0.312784	0.000312784	687304	614551	10.5854	14993.4	1086.85	7.24883	6.29091	5.10039e+17	0.0243974	5.36103e+07

## Sheet: KB_labdata
Sample Name	Weight after 3 US (g)	Qtz Mass used for analyses (g)	corrected Qtz Mass used for analyses (g)	Be carrier weight (g)	Be carrier concentration (mg/g)	Be carrier (mg)
MC-P6-1	80.04	41.6895	41.6895	1.0427	0.2988	0.311559
MC-P6-2	56.04	44.8896	44.8896	1.0072	0.2988	0.300951
MC-P7-1	49.25	49.2385	49.2385	1.04444	0.2988	0.312079
MC-P7B-1	47.13	47.1277	47.1277	1.0413	0.2988	0.31114
MC-P7-2	65.31	40.1762	40.1762	1.0446	0.2988	0.312126
MC-P8-1	51.43	40.1684	40.1684	1.04382	0.2988	0.311893
LC-1	41.76	41.7329	42	1.0448	0.2988	0.312186
MCP-11	40.92	40.9221	40.9221	1.046	0.2988	0.312545
MCP-11A	61.27	40.0045	40.0045	1.0492	0.2988	0.313501
MCP-11B	56.85	40.988	40.988	1.0468	0.2988	0.312784
BB-MC (blank)			0	1.0236	0.2988	0.305852
