# Supplementary material for: Chlorine-36∕beryllium-10 burial dating of alluvial fan sediments associated with the Mission Creek strand of the San Andreas Fault system, California, USA
Source: Copernicus journal article supplement (doi:10.5194/gchron-1-1-2019), 2019-07-18
Supplement: Supplementary file 2 [file SF2_201806_Be10_datareduction.xlsx]

## Sheet: Sheet1
Be-10 data reduction for 36/10 burial dating, June 2018, CAMS chem batches 16 and 18
Questions on this spreadsheet: Greg Balco, balcs@bgc.org
CHEM DATA ---------------------------------------			AMS DATA -----------------------------------------------------------
Sample name	wt qtz (g)	wt Be-9 (ug)	Sample name	AMS ID	Rm	delRm
1. Blanks							Total atoms	+/-
16Blank	0	261.517	16Blank	BE44139	5.51589e-15	1.1913e-15	96390.8	20818.1
18Blank	0	260.683	18Blank	BE44561	5.21978e-15	4.10115e-16	90925.3	7143.95
						Avg blank	93658	Use this
						SD	3864.69	Unrealistically small
						Mean err	13981	Use this instead
											Blank pct	N10
2. Samples batch 16							Total atoms	+/-	Less blank	+/-	of tot ats	atoms/g	+/-	pct err	AMS pct err
16MCP-8U-1	25.07	261.892	16MCP-8U-1	BE44133	1.44025e-14	2.06682e-15	252045	36169.6	158387	38777.7	37.1592	6317.79	1546.78	24.4829	14.3505
16MCP-6-T2	15.97	261.785	16MCP-6-T2	BE44136	1.24363e-14	1.22835e-15	217547	21487.5	123889	25635.6	43.0518	7757.62	1605.23	20.6923	9.87717
16MCP-7-B2	25.14	261.303	16MCP-7-B2	BE44137	1.45102e-14	2.09304e-15	253360	36546.2	159702	39129.2	36.9664	6352.5	1556.45	24.5014	14.4246
3. Samples batch 18
18MCP-7-B3	23.27	260.32	18MCP-7-B3	BE44557	9.68088e-15	5.10435e-16	168400	8879.06	74741.7	16562.2	55.6165	3211.93	711.741	22.1593	5.27261
18MCP-8U-1	17.29	260.735	18MCP-8u-1	BE44558	9.73845e-15	5.1756e-16	169672	9017.37	76013.6	16636.8	55.1996	4396.39	962.219	21.8866	5.3146
18MCP-8-3	11.77	263.022	18MCP-8-3	BE44560	1.0722e-14	6.0648e-16	188446	10659.3	94787.6	17580.9	49.7003	8053.32	1493.71	18.5477	5.65642
18MoronCanC	7.56	263.333	18MoranCanC	BE44554	3.74219e-14	9.90945e-16	658493	17437.1	564835	22350	14.2231	74713.7	2956.35	3.9569	2.64803
4. Summary
Averaging MCP-8U-1	N	delN	Wi	WiXi
	6317.79	1546.78	4.1797e-07	0.00264065		EWM	4932.48
	4396.39	962.219	1.08007e-06	0.00474841		SE	817.03
						Average	5357.09	Use this
In order on Cl-36 spreadsheet for pasting into MATLAB code						SD	1358.64
MCP--6-T2	7757.62	1605.23
MCP-7-B2	6352.5	1556.45
MCP-7-B3	3211.93	711.741
MCP-8U-1	5357.09	1358.64
MCP-8-3	8053.32	1493.71
MoCan-C	74713.7	2956.35
