# Supplementary material for: Chlorine-36∕beryllium-10 burial dating of alluvial fan sediments associated with the Mission Creek strand of the San Andreas Fault system, California, USA
Source: Copernicus journal article supplement (doi:10.5194/gchron-1-1-2019), 2019-07-18
Supplement: Supplementary file 3 [file SF3_Cl36datareduction.xls]

## Sheet: Spike calib
This overall spreadsheet computes how much Cl-36 is in the samples run in 2014-15.
This worksheet figures out what the ratio and concentration of the Cl-37 spike are.
Questions on this spreadsheet: Greg Balco, balcs@bgc.org
Page 1: spike calibration
Relevant AMS data cut and pasted from AMS results (20150326):
Sample name		runs	rtorstd	exteerror	R35/37	delR35/37
												pct AMS err
spike-ck-1-140824	CL14311	2	0.488356	0.0036789	1.52709	0.0115039	KNSTD1600	ID measurement of Cl concentration in spike				0.753323
spike-ck-2-140824	CL14312	1	0.56582	0	1.76932	0	KNSTD1600	This one apparently did not run.
spike-IR-140824	CL14313	3	0.344534	0.0027284	1.07736	0.00853171	KNSTD1600	Direct measurement of 35/37 ratio in spike				0.79191
LLNL a priori Cl concentration (mg/g)		1.389	ug/g	1389	This value is from previous characterization of the spike and was written on the bottle as well.
Check 1: Direct measurement of 35/37 in standard is:				1.07736	+/-	0.00853171
LLNL a priori 35/37 ratio:				1.0248	From Bob's records
		ratio measured/expected		1.05129
Conclusion: the actual 35/37 ratio of the spike is 5% higher than nominal.
Henceforth assume spike ratio is as measured --				1.07736	+/-	0.00853171
Check 2: ID determination of Cl concentration in spike
Calculate amounts of 35,37 added as normal							Normal Cl fx 35		0.7577		mol wt Cl-35	34.9689
Wt of normal Cl added (ug)		552.1					Normal Cl fx 37		0.2423		mol wt Cl-37	36.9659
Wt of normal Cl added (g)		0.0005521					Normal Cl 35/37		3.12712	Rn
Mol normal Cl added (g)		1.55728e-05	g / g/mol				Normal Cl mol wt		35.4527	g/mol
Mol Cl-35 added as normal		1.17995e-05	N35n				Spike Cl fx 35		0.518619
Mol Cl-37 added as normal		3.7733e-06					Spike Cl fx 37		0.481381
							Spike Cl 35/37		1.07736	Rs	From above
Now calculate amount of Cl-35 in spike							Spike Cl mol wt		35.9302
Mol Cl-35 added as spike		1.44629e-05	N35s	This is N35n * (Rm/Rn - 1) / (1 - Rm/Rs)
dN35s/dRm		4.11979e-05		Thanks to Wolfram online derivative calculator
dN35s/dRs		-4.55832e-05		Thanks to Wolfram online derivative calculator
dN35s		6.13076e-07
pct err		4.23897
				uncert
Mol Cl added as spike		2.78872e-05	+/-	1.18213e-06
g Cl added as spike		0.00100199	+/-	4.24742e-05
ug Cl added as spike		1001.99	+/-	42.4742
Spike soln wt g		0.6956
spike Cl conc ug/g		1440.47	+/-	61.0612	ug Cl/g spike
Compare to nominal		1389
Ratio to nominal		1.03706		0.0408749
So the concentration measured by ID is actually not distinguishable from the nominal concentration from Bob's initial dilution spreadsheet.
In addition, the IC concentration measurement was also not distinguishable from the nominal concentration.
Conclusion: we should use the nominal concentration of 1.389 mg/g.

## Sheet: Blanks
Data reduction for SAF Cl-36 samples
Page 2: Cl and Cl-36 blanks
Relevant AMS data from results spreadsheets (20150326 and 20160811)
36/37 ratios		runs	r to rstd	interror	exterror	truefrac	R36/37	uncert
140813-SAF-BLK	CL14309	2	0.0016485	0.0001411	0.000123	0.999978	1.08854e-14	9.31712e-16	This is the process blank from 2014 batch 1
HF-1408-Blank12	CL14310	2	0.0017246	0.0001536	0.0003949	0.999978	1.13879e-14	2.6076e-15	This is to determine Cl concentration in HF, also functions as a Cl-36 process blank
Blank_KB_GB_2016	CL14596	3	0.0014966	0.0001542	8.23e-05	1	9.88235e-15	1.01821e-15	This is the process blank from 2016 batch 2
35/37 ratios			r to rstd	exterror	R35/37	uncert
140813-SAF-BLK	CL14309	2	0.351708	0.0036713	1.09979	0.0114802
HF-1408-Blank12	CL14310	2	0.358054	0.0038417	1.11964	0.012013
Blank_KB_GB_2016	CL14596	3	0.35386	0.0040166	1.10652	0.0125599
Relevant sample data
Sample name	Sample wt	Carrier Cl	HF added
	(g)	(mg)	(ml)
140813-SAF-BLK	0	1386.5	45
HF-1408-Cl_BLANK	0	1388.58	99
Blank_KB_GB_2016	0	1382.75	48
Step 1. Figure out how much Cl is in the HF. You can do this both from the process blank and the "HF blank".
Assume HF contains normal Cl. 35/37 ratio of normal Cl is:				3.12712
35/37 ratio of spike Cl is:				1.07736	0.00853171	pct err	0.79191
Molar wt of spike is:				35.9302
Molar wt of normal Cl is:				35.4527
		Rm	delRm			approx
Sample name	Spike Cl	R35/37	delR35/37	N35sp(mol)	N35sa(mol)	delN35sa(mol)	Sample Cl	+/-	Cl in sample	+/-	Cl in sample	+/-	HF added	Cl conc in HF	+/-	dN35sa/dRm	dN35sa/dRs
	added (ug)						(mol)	(mol)	(g)	(g)	(ug)		(ml)	(ug/ml)	(ug/ml)
140813-SAF-BLK	1386.5	1.09979	0.0114802	2.00128e-05	6.42766e-07	9.80375e-07	8.48312e-07	1.29388e-06	3.0075e-05	4.58717e-05	30.075	45.8717	45	0.668333	1.01937	-2.897e-05	0.000108096
HF-1408-Cl_BLANK	1388.58	1.11964	0.012013	2.00429e-05	1.22521e-06	6.12596e-07	1.61702e-06	8.08494e-07	5.73276e-05	2.86633e-05	57.3276	28.6633	99	0.579067	0.289529	-2.959e-05	5.8478e-05
Blank_KB_GB_2016	1382.75	1.10652	0.0125599	1.99587e-05	8.36068e-07	8.00117e-07	1.10343e-06	1.05598e-06	3.91196e-05	3.74374e-05	39.1196	37.4374	48	0.814991	0.779947	-2.90844e-05	8.34371e-05
Conclusion: Cl concentration in HF is		0.611658	+/-	0.262291	ug/ml	Error-weighted mean of three measurments								Averaging terms		Wi	WiXi
																0.962355	0.643173
																11.9294	6.9079
																1.64388	1.33975
Step 2. Compute Cl-36 blanks in atoms.
											Rm		Atoms
	Spike Cl	Spike Cl-37	Uncert	HF	Cl added in	Uncert	Cl-37 added		Total Cl-37 (ats)		36/37		Cl-36	uncert
Sample name	added (ug)	added (ats)	(assume 1%)		HF (ug)		in HF (ats)
140813-SAF-BLK	1386.5	1.11864e+19	1.11864e+17	45	27.5246	11.8031	1.13283e+17	4.85781e+16	1.12997e+19	1.21956e+17	1.08854e-14	9.31712e-16	123001	10611.4
HF-1408-Cl_BLANK	1388.58	1.12032e+19	1.12032e+17	99	60.5542	25.9668	2.49223e+17	1.06872e+17	1.14524e+19	1.54831e+17	1.13879e-14	2.6076e-15	130419	29915.4
Blank_KB_GB_2016	1382.75	1.11561e+19	1.11561e+17	48	29.3596	12.59	1.20835e+17	5.18166e+16	1.1277e+19	1.23008e+17	9.88235e-15	1.01821e-15	111443	11546.5
							pct from HF					avg	121621
							1.01269					stdev	9562.93	Use this
							2.22457					mean err	17357.8

## Sheet: samples batch 1
Sheet 3a. Data reduction for batch 1 samples.
1. Accumulate data. From AMS results spreadsheet (20150326).
CAMS 35/37 ratios				CAMS 36/37 ratios				Chem lab data
										Spike Cl		HF added
Sample	CL no.	R35/37	delR	Sample	ID	R36/37	delR	Sample	Sample wt.	added (ug)		(ml)
LC-1	CL14299	1.18144	0.00694944	LC-1	CL14299	6.09106e-14	2.0952e-15	LC-1	13.9062	1386.22	LC-1	44
MC-P6-1	CL14300	1.1712	0.00679653	MC-P6-1	CL14300	7.53848e-14	2.09387e-15	MC-P6-1	14.7487	1381.08	MC-P6-1	50
MC-P6-2	CL14301	1.17062	0.00560609	MC-P6-2	CL14301	7.99661e-14	2.33093e-15	MC-P6-2	14.3574	1356.08	MC-P6-2	48
MC-P7-1	CL14302	1.48102	0.00337966	MC-P7-1	CL14302	1.0133e-13	2.42668e-15	MC-P7-1	16.5891	1404.83	MC-P7-1	49
MC-P7-2	CL14303	1.19651	0.00679904	MC-P7-2	CL14303	7.16982e-14	2.02124e-15	MC-P7-2	14.7961	1386.22	MC-P7-2	49
MC-P7B-1	CL14304	1.22164	0.00475742	MC-P7B-1	CL14304	7.08751e-13	9.87178e-15	MC-P7-B	14.4665	1393.72	MC-P7-B	46
MC-P8-1	CL14305	1.17565	0.0111956	MC-P8-1	CL14305	2.69827e-14	1.39988e-15	MC-P8-1	10.9724	1393.17	MC-P8-1	39
MCP-11	CL14306	1.19108	0.00797385	MCP-11	CL14306	7.56291e-14	2.21471e-15	MC-P11	13.1045	1391.64	MC-P11	45
MCP-11a	CL14307	1.19237	0	Apparent fizzle.				MC-P11a	15.8969	1391.64	MC-P11a	48
MCP-11b	CL14308	1.17123	0.0111524	MCP-11b	CL14308	1.21856e-13	3.03219e-15	MC-P11b	14.9929	1392.33	MC-P11b	50
2. Calculate total Cl
Molar wt of Cl in spike		35.9302
R35/37 of spike		1.07736
R35/37 of natural Cl		3.12712
	Contribution from spike					Cl in sample + HF											Cl-37 from spike
	Cl spike	Cl spike	Cl-37 added	Cl-35 added	Measured	Implied N35s	Implied N37s	Implied mol	Implied wt	Wt Cl	Cl added as		Cl in		ppm Cl		fxn of total
Sample	added (ug)	added (mol)	(mol)	(mol)	Cl-35/37	(mol)	(mol)	Cl	Cl (g)	(ug)	HF (ug)	uncert	sample (ug)	Uncert	in sample		Cl-37
LC-1	1386.22	3.8581e-05	1.85721e-05	2.00088e-05	1.18144	3.10682e-06	9.9351e-07	4.10033e-06	0.000147326	147.326	25.4789	12.7393	121.847	13.5633	8.76204	0.975338	0.949222
MC-P6-1	1381.08	3.84379e-05	1.85033e-05	1.99347e-05	1.1712	2.77603e-06	8.87729e-07	3.66376e-06	0.00013164	131.64	28.9533	14.4764	102.686	15.1363	6.96239	1.02628	0.95422
MC-P6-2	1356.08	3.77421e-05	1.81683e-05	1.95738e-05	1.17062	2.70821e-06	8.66041e-07	3.57425e-06	0.000128423	128.423	27.7952	13.8974	100.628	14.4227	7.00881	1.00455	0.954501
MC-P7-1	1404.83	3.9099e-05	1.88215e-05	2.02775e-05	1.48102	1.44329e-05	4.61542e-06	1.90484e-05	0.000684411	684.411	28.3743	14.1869	656.037	19.7502	39.5463	1.19055	0.803071
MC-P7-2	1386.22	3.8581e-05	1.85721e-05	2.00088e-05	1.19651	3.58425e-06	1.14618e-06	4.73044e-06	0.000169965	169.965	28.3743	14.1869	141.591	14.9952	9.5695	1.01345	0.941872
MC-P7-B	1393.72	3.87897e-05	1.86726e-05	2.01171e-05	1.22164	4.42144e-06	1.41391e-06	5.83535e-06	0.000209665	209.665	26.6371	13.3183	183.028	14.163	12.6519	0.979019	0.929609
MC-P8-1	1393.17	3.87743e-05	1.86652e-05	2.01091e-05	1.17565	2.93997e-06	9.40155e-07	3.88013e-06	0.000139414	139.414	22.5836	11.2916	116.83	13.0292	10.6476	1.18745	0.952046
MC-P11	1391.64	3.87317e-05	1.86447e-05	2.0087e-05	1.19108	3.42493e-06	1.09524e-06	4.52016e-06	0.00016241	162.41	26.058	13.0288	136.352	14.042	10.405	1.07154	0.944517
MC-P11a	1391.64	3.87317e-05	1.86447e-05	2.0087e-05	1.19237	3.46606e-06	1.10839e-06	4.57445e-06	0.000164361	164.361	27.7952	13.8974	136.566	14.2809	8.59072	0.898342	0.943888
MC-P11b	1392.33	3.87511e-05	1.8654e-05	2.00971e-05	1.17123	2.79967e-06	8.95289e-07	3.69496e-06	0.000132761	132.761	28.9533	14.4764	103.807	15.8468	6.92376	1.05696	0.954204
Error terms	d/dN35spike	d/dRm	del mol 35	del mol Cl	del ug Cl
	0.155272	1.09373e-05	9.81743e-08	1.29569e-07	4.65544
	0.139256	1.1018e-05	9.32212e-08	1.23032e-07	4.42056
	0.138359	1.08253e-05	8.13432e-08	1.07355e-07	3.8573
	0.711771	7.47802e-06	2.89763e-07	3.82424e-07	13.7406
	0.179133	1.07584e-05	1.02417e-07	1.35168e-07	4.85661
	0.219785	1.05164e-05	1.01601e-07	1.34091e-07	4.81793
	0.146201	1.10612e-05	1.37088e-07	1.80926e-07	6.5007
	0.170504	1.08651e-05	1.10444e-07	1.45762e-07	5.23727
	0.172552	1.08497e-05	6.93213e-08	9.14891e-08	3.28722
	0.139308	1.11074e-05	1.35942e-07	1.79414e-07	6.44636
3. Calculate total Cl-36
	Total Cl-37	Measured		Total		Atoms Cl-36		Atoms Cl-36		[Cl-36]		Blank pct
Sample	present (mol)	36/37 ratio	uncert	atoms Cl-36	uncert	from blank	uncert	less blank	uncert	(atoms/g)	est uncert	tot atoms	est uncert pct
LC-1	1.95656e-05	6.09106e-14	2.0952e-15	717675	24686.5	121621	9562.93	596054	26474	42862.4	1903.76	16.9465	4.44155
MC-P6-1	1.9391e-05	7.53848e-14	2.09387e-15	880288	24450.7	121621	9562.93	758667	26254.3	51439.6	1780.11	13.816	3.46058
MC-P6-2	1.90344e-05	7.99661e-14	2.33093e-15	916610	26718.3	121621	9562.93	794989	28378.1	55371.4	1976.55	13.2686	3.56962
MC-P7-1	2.34369e-05	1.0133e-13	2.42668e-15	1.43014e+06	34249.4	121621	9562.93	1.30852e+06	35559.4	78878.5	2143.54	8.5041	2.71752
MC-P7-2	1.97183e-05	7.16982e-14	2.02124e-15	851371	24001	121621	9562.93	729750	25835.9	49320.5	1746.13	14.2853	3.54038
MC-P7-B	2.00865e-05	7.08751e-13	9.87178e-15	8.57313e+06	119410	121621	9562.93	8.45151e+06	119793	584213	8280.68	1.41863	1.41741
MC-P8-1	1.96053e-05	2.69827e-14	1.39988e-15	318566	16527.4	121621	9562.93	196945	19094.7	17949.2	1740.24	38.1776	9.6954
MC-P11	1.974e-05	7.56291e-14	2.21471e-15	899033	26327.2	121621	9562.93	777412	28010.2	59324.1	2137.45	13.528	3.603
MC-P11a	1.97531e-05
MC-P11b	1.95493e-05	1.21856e-13	3.03219e-15	1.43456e+06	35696.7	121621	9562.93	1.31294e+06	36955.5	87570.9	2464.86	8.47791	2.81471
Note (20151130) it may be more sensible to subtract blank as 36/37 ratio rather than number of atoms.
However, for these data that shouldn't really matter.

## Sheet: samples batch 2
Sheet 3b. Data reduction for batch 2 samples.
1. Accumulate data. From AMS results spreadsheet (20160811).
CAMS 35/37 ratios				CAMS 36/37 ratios				Chem lab data
										Spike Cl		HF added
Sample	CL no.	R35/37	delR	Sample	ID	R36/37	delR	Sample	Sample wt.	added (ug)		(ml)
MCP-6 T2	CL14587	1.22927	0.00731155	MCP-6 T2	CL14587	1.04103e-13	3.71298e-15	MCP--6-T2	17.2893	1374.42	MCP--6-T2	60
MCP-7-B2	CL14588	1.20389	0.00798948	MCP-7-B2	CL14588	4.32292e-14	1.84229e-15	MCP-7-B2	16.4596	1390.94	MCP-7-B2	58
MCP-7-B3	CL14589	1.1805	0.0371656	MCP-7-B3	CL14589	4.90776e-14	3.07643e-15	MCP-7-B3	16.3107	1397.33	MCP-7-B3	61
MCP-8U	CL14590	1.24369	0.007623	MCP-8U	CL14590	4.37535e-14	1.83635e-15	MCP-8U-1	16.743	1384.56	MCP-8U-1	60
MCP-8-3	CL14591	1.29274	0.00833533	MCP-8-3	CL14591	5.94341e-14	3.74137e-15	MCP-8-3	18.3339	1393.44	MCP-8-3	60
TP-16-2A	CL14592	1.13912	0	TP-16-2A	CL14592	1.25689e-13		TP-16-2A	16.499	1386.78	TP-16-2A	59
TP-16-2B	CL14593	1.37527	0.000819274	TP-16-2B	CL14593	1.36698e-13	3.90777e-15	TP-16-2B	16.4088	1394.28	TP-16-2B	60
MoCan A	CL14594	1.19852	0.00752294	MoCan A	CL14594	2.98411e-13	5.13399e-15	MoCan-A	17.8859	1408.45	MoCan-A	59
MoCan C	CL14595	1.22921	0.0137119	MoCan C	CL14595	4.82185e-13	1.69999e-14	MoCan-C	18.6022	1392.89	MoCan-C	61
2. Calculate total Cl
Molar wt of Cl in spike		35.9302
R35/37 of spike		1.07736
R35/37 of natural Cl		3.12712
	Contribution from spike					Cl in sample + HF											Cl-37 from spike
	Cl spike	Cl spike	Cl-37 added	Cl-35 added	Measured	Implied N35s	Implied N37s	Implied mol	Implied wt	Wt Cl	Cl added as		Cl in		ppm Cl		fxn of total
Sample	added (ug)	added (mol)	(mol)	(mol)	Cl-35/37	(mol)	(mol)	Cl	Cl (g)	(ug)	HF (ug)	uncert	sample (ug)	uncert (ug)	in sample	uncert (ppm)	Cl-37
MCP--6-T2	1374.42	3.82524e-05	1.8414e-05	1.98384e-05	1.22927	4.60932e-06	1.47399e-06	6.08331e-06	0.000218575	218.575	34.744	17.3717	183.831	18.2645	10.6326	1.05641	0.925885
MCP-7-B2	1390.94	3.87124e-05	1.86354e-05	2.0077e-05	1.20389	3.83395e-06	1.22604e-06	5.05999e-06	0.000181806	181.806	33.5859	16.7927	148.221	17.6542	9.00511	1.07258	0.938271
MCP-7-B3	1397.33	3.88902e-05	1.8721e-05	2.01692e-05	1.1805	3.10206e-06	9.91988e-07	4.09405e-06	0.0001471	147.1	35.3231	17.6612	111.777	26.4364	6.85298	1.6208	0.949678
MCP-8U-1	1384.56	3.85346e-05	1.85498e-05	1.99848e-05	1.24369	5.12293e-06	1.63823e-06	6.76116e-06	0.00024293	242.93	34.744	17.3717	208.186	18.4103	12.4342	1.09958	0.918851
MCP-8-3	1393.44	3.8782e-05	1.86689e-05	2.01131e-05	1.29274	6.85468e-06	2.19201e-06	9.04669e-06	0.000325049	325.049	34.744	17.3717	290.305	18.9376	15.8344	1.03293	0.894922
TP-16-2A	1386.78	3.85964e-05	1.85796e-05	2.00169e-05	1.13912	1.80508e-06	5.77236e-07	2.38232e-06	8.55972e-05	85.5972	34.1649	17.0822	51.4322	17.1678	3.11729	1.04053	0.969868
TP-16-2B	1394.28	3.88052e-05	1.86801e-05	2.01251e-05	1.37527	9.93376e-06	3.17665e-06	1.31104e-05	0.00047106	471.06	34.744	17.3717	436.316	19.7648	26.5904	1.20453	0.85466
MoCan-A	1408.45	3.91995e-05	1.88699e-05	2.03296e-05	1.19852	3.70712e-06	1.18548e-06	4.8926e-06	0.000175792	175.792	34.1649	17.0822	141.627	17.869	7.91836	0.999054	0.94089
MoCan-C	1392.89	3.87665e-05	1.86615e-05	2.01051e-05	1.22921	4.66916e-06	1.49312e-06	6.16228e-06	0.000221412	221.412	35.3231	17.6612	186.089	19.4276	10.0036	1.04437	0.925917
Error terms	d/dN35spike	d/dRm	del mol 35	del mol Cl	del ug Cl
	0.232343	1.02808e-05	1.18948e-07	1.56986e-07	5.64054
	0.190962	1.07071e-05	1.1488e-07	1.51617e-07	5.44762
	0.153802	1.10362e-05	4.14834e-07	5.4749e-07	19.6714
	0.256342	1.01856e-05	1.28556e-07	1.69666e-07	6.09612
	0.340807	9.66539e-06	1.59013e-07	2.09863e-07	7.54042
	0.0901781	1.14446e-05	3.61017e-08	4.76464e-08	1.71194
	0.4936	8.68519e-06	1.98803e-07	2.62376e-07	9.42724
	0.182351	1.09066e-05	1.10586e-07	1.45949e-07	5.24398
	0.232238	1.04198e-05	1.70686e-07	2.25269e-07	8.09394
3. Calculate total Cl-36
	Total Cl-37	Measured		Total	uncert	Atoms Cl-36		Atoms Cl-36		[Cl-36]		Blank pct
Sample	present (mol)	36/37 ratio	uncert	atoms Cl-36	est. uncert	from blank	uncert	less blank	est uncert	(atoms/g)	est uncert	tot atoms	est uncert pct
MCP--6-T2	1.98879e-05	1.04103e-13	3.71298e-15	1.24679e+06	44468.6	121621	9562.93	1.12517e+06	45485.2	65078.9	2630.83	9.75473	4.04253
MCP-7-B2	1.98614e-05	4.32292e-14	1.84229e-15	517045	22034.9	121621	9562.93	395424	24020.5	24023.9	1459.36	23.5223	6.07461
MCP-7-B3	1.9713e-05	4.90776e-14	3.07643e-15	582609	36520.8	121621	9562.93	460988	37752.1	28262.9	2314.56	20.8752	8.18939
MCP-8U-1	2.0188e-05	4.37535e-14	1.83635e-15	531921	22324.9	121621	9562.93	410300	24286.9	24505.8	1450.57	22.8645	5.91929
MCP-8-3	2.08609e-05	5.94341e-14	3.74137e-15	746637	47000.8	121621	9562.93	625017	47963.8	34090.8	2616.13	16.2892	7.674
TP-16-2A	1.91568e-05	1.25689e-13	0	1.44998e+06	115998	121621	9562.93	1.32836e+06	116392	80511.6	7054.49	8.38776	8.76208
TP-16-2B	2.18567e-05	1.36698e-13	3.90777e-15	1.79924e+06	51434.6	121621	9562.93	1.67762e+06	52316	102239	3188.29	6.75958	3.11847
MoCan-A	2.00554e-05	2.98411e-13	5.13399e-15	3.60401e+06	62004.9	121621	9562.93	3.48239e+06	62738	194700	3507.68	3.3746	1.80158
MoCan-C	2.01546e-05	4.82185e-13	1.69999e-14	5.85232e+06	206330	121621	9562.93	5.7307e+06	206551	308066	11103.6	2.07817	3.60429
Note: no reported uncertainty from CAMS on TP-16-2A -- only ran one block. Assuming 8%.

## Sheet: uncert test
This spreadsheet shows a test to determine whether error correlation between 35/37 and 36/37 is important.
Uses a Monte Carlo simulation in separate MATLAB code.
This can be ignored for any subsequent calculations.
1. Extract synthetic uncertainties on 35,36,37 separately to achieve proper error correlation in MC simulation
Stable	R35/37	del	pct err	del35,37	Rare	R36/37	delR	del36
LC-1	1.18144	0.00694944	0.588218	0.00448978	LC-1	6.09106e-14	2.0952e-15	2.07727e-15
MC-P6-1	1.1712	0.00679653	0.580307	0.00441324	MC-P6-1	7.53848e-14	2.09387e-15	2.06728e-15
MC-P6-2	1.17062	0.00560609	0.478899	0.00364128	MC-P6-2	7.99661e-14	2.33093e-15	2.31267e-15
MC-P7-1	1.48102	0.00337966	0.228199	0.00189124	MC-P7-1	1.0133e-13	2.42668e-15	2.4191e-15
MC-P7-2	1.19651	0.00679904	0.568241	0.00436012	MC-P7-2	7.16982e-14	2.02124e-15	1.99692e-15
MC-P7B-1	1.22164	0.00475742	0.389428	0.00301343	MC-P7B-1	7.08751e-13	9.87178e-15	9.63798e-15
MC-P8-1	1.17565	0.0111956	0.952288	0.00725374	MC-P8-1	2.69827e-14	1.39988e-15	1.38613e-15
MCP-11	1.19108	0.00797385	0.669461	0.00512718	MCP-11	7.56291e-14	2.21471e-15	2.1805e-15
MCP-11b	1.17123	0.0111524	0.9522	0.00724158	MCP-11b	1.21856e-13	3.03219e-15	3.03219e-15
2. Summarize to send to MATLAB
	N35	delN35	N37	delN37	N36	delN36
LC-1	1.18144	0.00448978	1	0.00448978	6.09106e-14	2.07727e-15
MC-P6-1	1.1712	0.00441324	1	0.00441324	7.53848e-14	2.06728e-15
MC-P6-2	1.17062	0.00364128	1	0.00364128	7.99661e-14	2.31267e-15
MC-P7-1	1.48102	0.00189124	1	0.00189124	1.0133e-13	2.4191e-15
MC-P7-2	1.19651	0.00436012	1	0.00436012	7.16982e-14	1.99692e-15
MC-P7B-1	1.22164	0.00301343	1	0.00301343	7.08751e-13	9.63798e-15
MC-P8-1	1.17565	0.00725374	1	0.00725374	2.69827e-14	1.38613e-15
MCP-11	1.19108	0.00512718	1	0.00512718	7.56291e-14	2.1805e-15
MCP-11b	1.17123	0.00724158	1	0.00724158	1.21856e-13	3.03219e-15
	Use these to generate correlated ratios in MC simulation.
Results
From MATLAB MCS code
ppm Cl	uncert	N36(at/g)	uncert
8.7271	1.1825	42485	2316
6.9443	1.189	51113	2161
6.9761	1.1051	55020	2324
39.5151	0.9569	78575	2415
9.5435	1.1799	49010	2130
12.6157	1.0535	583906	8436
10.6175	1.8663	17486	2372
10.3724	1.3534	58957	2531
6.8797	1.4537	87267	2884
These are exactly the same as the simple uncertainties for Cl-36, and within 10% of the simple uncertainties for total Cl. Ignore this issue. .

## Sheet: summary
Summary data
Sample	[Cl] (ppm)	uncert	N36 (at/g)	uncert
Batch 1
LC-1	8.76204	0.975338	42862.4	2316
MC-P6-1	6.96239	1.02628	51439.6	2161
MC-P6-2	7.00881	1.00455	55371.4	2324
MC-P7-1	39.5463	1.19055	78878.5	2415
MC-P7-2	9.5695	1.01345	49320.5	2130
MC-P7-B	12.6519	0.979019	584213	8436
MC-P8-1	10.6476	1.18745	17949.2	2372
MC-P11	10.405	1.07154	59324.1	2531
MC-P11a	8.59072	0.898342
MC-P11b	6.92376	1.05696	87570.9	2884
Batch 2
MCP--6-T2	10.6326	1.05641	65078.9	2630.83
MCP-7-B2	9.00511	1.07258	24023.9	1459.36
MCP-7-B3	6.85298	1.6208	28262.9	2314.56
MCP-8U-1	12.4342	1.09958	24505.8	1450.57
MCP-8-3	15.8344	1.03293	34090.8	2616.13
TP-16-2A	3.11729	1.04053	80511.6	7054.49
TP-16-2B	26.5904	1.20453	102239	3188.29
MoCan-A	7.91836	0.999054	194700	3507.68
MoCan-C	10.0036	1.04437	308066	11103.6
