# Supplementary material for: Chlorine-36∕beryllium-10 burial dating of alluvial fan sediments associated with the Mission Creek strand of the San Andreas Fault system, California, USA
Source: Copernicus journal article supplement (doi:10.5194/gchron-1-1-2019), 2019-07-18
Supplement: Supplementary file [file gchron-1-1-2019-supplement-title-page.pdf › gchron-1-1-2019-supplement-title-page.pdf]

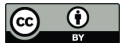

## *Supplement of*

# **Chlorine-36/beryllium-10 burial dating of alluvial fan sediments associated with the Mission Creek strand of the San Andreas Fault system, California, USA**

**Greg Balco et al.**

*Correspondence to:* Greg Balco (balcs@bgc.org)

- gchron-1-1-2019-supplement-title-page.pdf
- SF1\_201504\_Be10\_datareduction.xlsx
- SF2\_201806\_Be10\_datareduction.xlsx
- SF3\_Cl36datareduction.xls

The copyright of individual parts of the supplement might differ from the CC BY 4.0 License.
